# Supplementary material
Source: PubMed Central journal article supplement (PMC3430334)

## Supplemental Material

**Table S1.** Primers, plasmids and strains used in experiments

| Primers                       | Sequence                                                                                         |
|-------------------------------|--------------------------------------------------------------------------------------------------|
| <i>BsnifZ</i> -PciI5          | 5'-GCGGACATGTTATATTTAGATAAATAG-3'                                                                |
| <i>BsnifZ</i> -BamHI3         | 5'-TAAAGGATCCATGTTCTACCTCATC-3'                                                                  |
| <i>BsnifZ</i> '-BamHI3        | 5'-CTCGGATCCCTTAATTTTTTGGATGCC-3'                                                                |
| <i>BsthiI</i> -PciI5          | 5'-CACATGTATTACGATCATATATTAATTCG-3'                                                              |
| <i>BsthiI</i> -BglII3         | 5'-CGAGATCTACAAAGCTTTCAAAGTG-3'                                                                  |
| <i>BsthiI</i> -NheI5          | 5'-CATGGCTAGCGATCATATTAATTCG-3'                                                                  |
| <i>BsthiI</i> -KpnI3          | 5'-CTGAGGTACCTCCTTGTGAGTATAGAATGTGTC-3'                                                          |
| <i>BssufC</i> -NcoI3          | 5'-TACCATGGCTGCTTCAACATTAAC-3'                                                                   |
| <i>BssufC</i> -BamHI5         | 5'-CAGGATCCGGAGTGATGTAG-3'                                                                       |
| <i>Bssuf</i> -pro5            | 5'-GAGTCGACGTATCTGAATAAGACTGAAAC-3'                                                              |
| <i>Bssuf</i> -pro3            | 5'-GTCCCGGGTGAAGCAGCCATAT-3'                                                                     |
| <i>EctRNA</i> <sup>Met5</sup> | 5'-AATTCCTGCAGTATACGACTCACTATAGGCTACGTA<br>GCTCAGTTGGTTAGAGCACATCACTCATAATGATGGG<br>GTCACAGG -3' |
| <i>EctRNA</i> <sup>Met3</sup> | 5'-mUmGGTGGCTACGACGGGATTCGAACCTGTGAC<br>CCATCATTATG-3'                                           |

  

| Plasmids | Relevant Gene Cloned                                                                                                                                                                                  | Vector      | Reference |
|----------|-------------------------------------------------------------------------------------------------------------------------------------------------------------------------------------------------------|-------------|-----------|
| pDS13    | <i>nifZ</i> PCR product using <i>BsnifZ</i> -PciI5 and <i>BsnifZ</i> -BamHI3 primers. It places PciI and BamHI sites at 5' and 3' sites flanking <i>nifZ</i> coding sequence (codons 2-382)           | pCR2.1 TOPO | This work |
| pDS18    | <i>thil</i> ' PCR product using <i>BsthiI</i> -PciI5 and <i>BsthiI</i> -BglII3 primers. It places PciI and BglII sites at 5' and 3' sites flanking <i>thil</i> ' coding sequence (codons 1-358)       | pCR2.1 TOPO | This work |
| pDS19    | 908 bp HindIII ' <i>thil</i> ' fragment (198-1101 bp) from pDS18 into the HindIII site of pMutin4 plasmid.                                                                                            | pMutin4     | This work |
| pDS20    | 1.1 kb PciI-BglII fragment of <i>thil</i> ' ligated into NcoI-BglII sites of pAra13                                                                                                                   | pAra13      | This work |
| pDS21    | 1.15 kb PciI and BamHI <i>nifZ</i> fragment from pDS13 ligated <i>nifZ</i> gene into NcoI-BglII sites of pAra13.                                                                                      | pAra13      | This work |
| pDS47    | <i>nifZ</i> ' PCR product using <i>BsnifZ</i> -PciI5 and <i>BsnifZ</i> '-BamHI3 primers. It places PciI and BamHI sites at 5' and 3' sites of <i>nifZ</i> (codons 2-380).                             | pCR2.1 TOPO | This work |
| pDS54    | 650 bp BglII-BamHI ' <i>nifZ</i> ' fragment (codons 130-380) ligated in forward orientation into BamHI-digested pMutin4 plasmid.                                                                      | pMutin4     | This work |
| pDS71    | 2.2 kB <i>nifZ</i> - <i>thil</i> ' PCR product amplified with primers <i>BsnifZ</i> -PciI5 and <i>BsthiI</i> -BglII3.                                                                                 | pCR2.1 TOPO | This work |
| pDS80    | 2.2 kB StuI-KpnI ' <i>nifZ</i> - <i>thil</i> ' fragment ligated into StuI-KpnI sites of pDS21                                                                                                         | pAra13      | This work |
| pDS101   | <i>thil</i> PCR product using <i>BsthiI</i> -NheI5 and <i>BsthiI</i> -KpnI3 primers. It places NheI and KpnI sites at 5' and 3' sites of <i>thil</i> (codons 1-403, and additional 90 bp downstream). | pCR2.1 TOPO | This work |
| pDS108   | 976 bp NruI-KpnI ' <i>thil</i> fragment from pDS101 ligated into NruI-KpnI sites of pDS20                                                                                                             | pAra13      | This work |
| pDS115   | 976 bp NruI-KpnI ' <i>thil</i> fragment from pDS101 ligated into NruI-KpnI sites of pDS80.                                                                                                            | pAra13      | This work |
| pBH113   | <i>Escherichia coli thil</i>                                                                                                                                                                          | pet15b      | (3)       |
| pDB943   | <i>Azotobacter vinelandii iscS</i>                                                                                                                                                                    | pT7-7       | (6)       |

| Strain                   | Relevant Genotype     | Reference                      |
|--------------------------|-----------------------|--------------------------------|
| <i>B. subtilis</i> PS832 | wild type strain      | (1)                            |
| <i>B. subtilis</i> DD5   | 'nifZ':pMutin4        | This work                      |
| <i>B. subtilis</i> DD14  | 'nifZ':pMutin4        | This work                      |
| <i>B. subtilis</i> 1A603 | thiA84::Tn197         | (4)                            |
| <i>E. coli</i> MG1655    | wild type strain      | Laboratory stock               |
| <i>E. coli</i> CL100     | $\Delta$ iscS         | (2)                            |
| <i>E. coli</i> JLD26501  | thi::Kan <sup>r</sup> | P1(VJS2890)→TL524 <sup>a</sup> |

<sup>a</sup> Constructed by phage P1-mediated transduction of strain TL524 (5) to kanamycin resistance using stain VSJ2890 (3) as P1 donor

## References

1. **Corfe, B. M., A. Moir, D. Popham, and P. Setlow.** 1994. Analysis of the expression and regulation of the gerB spore germination operon of *Bacillus subtilis* 168. *Microbiology* **140** ( Pt 11):3079-3083.
2. **Lauhon, C. T., and R. Kambampati.** 2000. The *iscS* gene in *Escherichia coli* is required for the biosynthesis of 4-thiouridine, thiamin, and NAD. *J. Biol. Chem.* **275**:20096-20103.
3. **Mueller, E. G., C. J. Buck, P. M. Palenchar, L. E. Barnhart, and J. L. Paulson.** 1998. Identification of a gene involved in the generation of 4-thiouridine in tRNA. *Nucleic Acids Res.* **26**:2606-2010.
4. **Vandeyar, M. A., and S. A. Zahler.** 1986. Chromosomal insertions of Tn917 in *Bacillus subtilis*. *J. Bacteriol.* **167**:530-534.
5. **Wolfe, M. D., F. Ahmed, G. M. Lacourciere, C. T. Lauhon, T. C. Stadtman, and T. J. Larson.** 2004. Functional diversity of the rhodanese homology domain: the *Escherichia coli* *ybbB* gene encodes a selenophosphate-dependent tRNA 2-selenouridine synthase. *J. Biol. Chem.* **279**:1801-1809.
6. **Zheng, L., V. L. Cash, D. H. Flint, and D. R. Dean.** 1998. Assembly of iron-sulfur clusters. Identification of an *iscSUA-hscBA-fdx* gene cluster from *Azotobacter vinelandii*. *J. Biol. Chem.* **273**:13264-13272.

**Figure S1.** Detection of s<sup>4</sup>U8 in tRNA nucleosides isolated from cells lacking NifZ and/or Thil. (A) HPLC-MS chromatograms at Abs<sub>330nm</sub> of tRNA nucleosides isolated from *B. subtilis* PS832, DD5 in the presence (*nifZ*<sup>+</sup>, *thil*<sup>+</sup>) and absence of IPTG (*nifZ*<sup>-</sup>, *thil*<sup>-</sup>) and DD14 culture in the presence (*nifZ*<sup>+</sup>, *thil*<sup>+</sup>) and absence (*nifZ*<sup>-</sup>, *thil*<sup>-</sup>) of IPTG. The peak corresponding to s<sup>4</sup>U was compared to the standard (shown on top), and to pseudouridine which was used as an internal control (not shown). (B) Negative mode mass spectrum of the peak corresponding to s<sup>4</sup>U.

**Figure S2.** Growth of *B. subtilis* strains in minimum medium in the presence (filled symbols) and in the absence (empty symbols) of 0.8 µg/mL thiamine. Cells were cultured in Spizizen's medium at 37°C, 300 RPM for PS832 (○) and DD14 in the absence (□) and presence (△) of IPTG. *B. subtilis* 1A603 (*thiA84::Tn917*) was cultured in Spizizen medium supplemented with tryptophan (◇). Growth patterns were monitored for 14 hours and optical density at 600 nm (A<sub>600nm</sub>) was recorded as indicated.

Figure S1

A

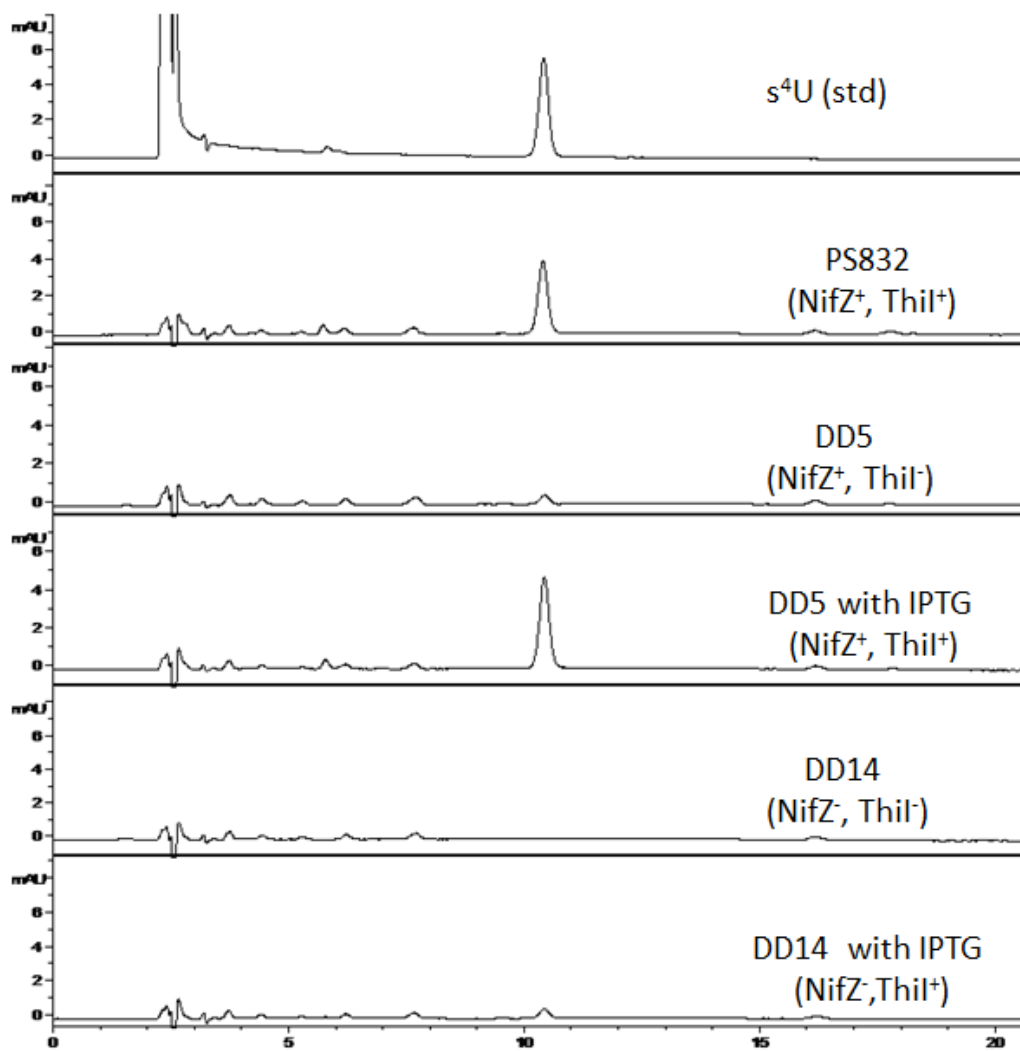

B

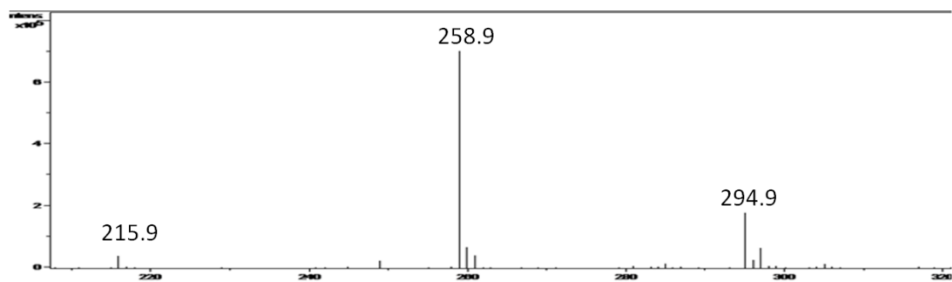

Figure S2

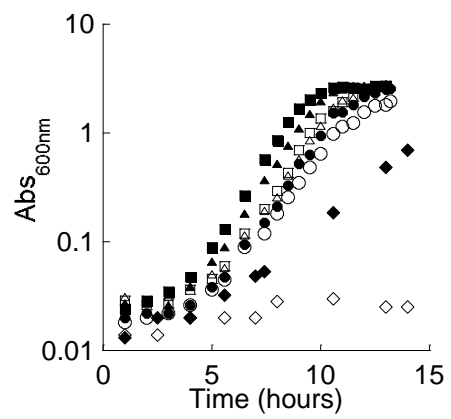

Supplement: JB.00842-12_zjb999091867so1.pdf [file JB.00842-12_zjb999091867so1.pdf]
